# Supplementary material
Source: HighWire-hosted journal article supplement (http://www.cmaj.ca/highwire/filestream/58716/field_highwire_adjunct_files/0/drug-gamble-1-at.pdf)
Supplement: drug-gamble-1-at.pdf [file drug-gamble-1-at.pdf]

**Appendix 1 (as supplied by authors): Drug plan formulary decisions based on 53 Common Drug Review recommendations**

| Generic name                              | Brand name   | Common Drug Review recommendation | Drug plans with positive listing decision                                                                                                                                                                           | Drug plans with negative listing decision |
|-------------------------------------------|--------------|-----------------------------------|---------------------------------------------------------------------------------------------------------------------------------------------------------------------------------------------------------------------|-------------------------------------------|
| Ciclesonide                               | Alvesco      | List                              | All provinces and NIHB (full listing)                                                                                                                                                                               | None                                      |
| nicotinic acid / lovastatin               | Advicor      | List                              | BC (full listing); QC (with criteria); NB (full listing); NS (full listing); PE (full listing); NL (full listing)                                                                                                   | AB; SK; MB; ON; NIHB                      |
| drospirenone / ethinyl estradiol          | Yasmin       | List                              | BC (full listing); AB (full listing); SK (full listing); MB (full listing); ON (Full listing); QC (full listing); NB (full listing); NS (full listing); PE (full listing); NL (full listing); NIHB (full listing)   | PE                                        |
| eprosartan mesylate / hydrochlorothiazide | Teveten Plus | List in a similar manner          | BC (with criteria); AB (full listing); SK (full listing); MB (full listing); ON (Full listing); QC (full listing); NB (full listing); NS (full listing); PE (full listing); NL (with criteria); NIHB (full listing) | None                                      |
| insulin glulisine                         | Apidra       | List in a similar manner          | BC (full listing); AB (full listing); SK (with criteria); ON (with criteria); QC (full listing); NB (full listing); NS (with criteria); NL (with criteria); NIHB (full listing)                                     | PE; MB                                    |

| Generic name                          | Brand name         | Common Drug Review recommendation | Drug plans with positive listing decision                                                                                                                                       | Drug plans with negative listing decision |
|---------------------------------------|--------------------|-----------------------------------|---------------------------------------------------------------------------------------------------------------------------------------------------------------------------------|-------------------------------------------|
| levodopa/<br>carbidopa/<br>entacapone | Stalevo            | List in a similar manner          | BC (with criteria); AB (full listing); SK (full listing); ON (with criteria); QC (full listing); NB (with criteria); NS (with criteria); NL (full listing); NIHB (full listing) | MB; PE                                    |
| lanreotide acetate                    | Somatuline Autogel | List in a similar manner          | AB (with criteria); SK (with criteria); ON (full listing); QC (full listing); NB (with criteria); NS (full listing); NL (full listing); NIHB (full listing)                     | BC; MB; PE                                |
| mycophenolate sodium                  | Myfortic           | List in a similar manner          | SK (with criteria); MB (with criteria); ON (full listing); QC (full listing); NB (full listing); PE (full listing); NIHB (with criteria)                                        | BC; AB; NS; NL                            |
| acamprosate calcium                   | Campral            | List with criteria                | QC (with criteria); NB (with criteria); NS (with criteria); NIHB (with criteria)                                                                                                | BC; AB; SK; MB; ON; PE; NL                |
| adalimumab                            | Humira             | List with criteria                | All provinces and NIHB (with criteria)                                                                                                                                          | None                                      |
| alglucosidase Alfa                    | Myozyme            | List with criteria                | SK (with criteria); ON (with criteria); QC (with criteria); NB (with criteria); NS (with criteria)                                                                              | BC; AB; MB; PE; NL; NIHB                  |
| ambrisentan                           | Volibris           | List with criteria                | SK (with criteria); QC (with criteria); NB (with criteria); NS (with criteria); NL (with criteria)                                                                              | BC; AB; MB; ON; PE; NIHB                  |

| Generic name                                                   | Brand name | Common Drug Review recommendation | Drug plans with positive listing decision                                                                                                                        | Drug plans with negative listing decision |
|----------------------------------------------------------------|------------|-----------------------------------|------------------------------------------------------------------------------------------------------------------------------------------------------------------|-------------------------------------------|
| amlodipine Besylate / atorvastatin Calcium                     | Caduet     | List with criteria                | SK (full listing); MB (with criteria); ON (with criteria); NB (with criteria); NS (full listing)                                                                 | BC; AB; QC; PE; NL; NIHB                  |
| buprenorphine hydrochloride / naloxone hydrochloride dihydrate | Suboxone   | List with criteria                | AB (full listing); QC (with criteria); NB (with criteria); NS (with criteria)                                                                                    | BC; SK; MB; ON; PE; NL; NIHB              |
| darifenacin Hydrobromide                                       | Enablex    | List with criteria                | AB (with criteria); SK (with criteria); NB (with criteria); NS (with criteria); NL (with criteria); NIHB (with criteria)                                         | BC; MB; ON; QC; PE                        |
| duloxetine hydrochloride                                       | Cymbalta   | List with criteria                | AB (with criteria); SK (with criteria); ON (full listing); QC (with criteria); NB (with criteria); NS (with criteria); NIHB (with criteria)                      | BC; MB; PE; NL                            |
| entecavir                                                      | Baraclude  | List with criteria                | BC (with criteria); AB (with criteria); SK (with criteria); QC (with criteria); NB (with criteria); NS (with criteria); NL (with criteria); NIHB (with criteria) | MB; ON; PE                                |
| rivaroxaban                                                    | Xarelto    | List with criteria                | AB (with criteria); SK (with criteria); MB (with criteria); ON (with criteria); QC (with criteria); NB (with criteria); NS (with criteria); NL (with criteria)   | BC; PE; NIHB                              |

| Generic name                          | Brand name | Common Drug Review recommendation | Drug plans with positive listing decision                                                                                                                                                                           | Drug plans with negative listing decision |
|---------------------------------------|------------|-----------------------------------|---------------------------------------------------------------------------------------------------------------------------------------------------------------------------------------------------------------------|-------------------------------------------|
| travoprost / timolol maleate          | DuoTrav    | List with criteria                | BC (full listing); AB (full listing); SK (full listing); MB (full listing); ON (with criteria); QC (with criteria); NB (full listing); NS (full listing); PE (full listing); NL (full listing); NIHB (full listing) | None                                      |
| tropium chloride                      | Trosec     | List with criteria                | AB (with criteria); SK (with criteria); MB (with criteria); QC (with criteria); NB (with criteria); NS (with criteria); PE (with criteria); NL (with criteria); NIHB (with criteria)                                | BC; ON                                    |
| ziprasidone hydrochloride monohydrate | Zeldox     | List with criteria                | BC (with criteria); AB (full listing); SK (full listing); MB (full listing); QC (full listing); NB (with criteria); NS (with criteria); NL (with criteria); NIHB (with criteria)                                    | ON; PE                                    |
| deferasirox                           | Exjade     | List with criteria                | BC (with criteria); AB (with criteria); SK (with criteria); ON (with criteria); NB (with criteria); NS (with criteria)                                                                                              | MB; QC; PE; NL; NIHB                      |
| natalizumab                           | Tysabri    | List with criteria                | AB (with criteria); SK (with criteria); ON (with criteria); QC (with criteria)                                                                                                                                      | BC; MB; NB; NS; PE; NL; NIHB              |

| Generic name                                    | Brand name | Common Drug Review recommendation | Drug plans with positive listing decision | Drug plans with negative listing decision |
|-------------------------------------------------|------------|-----------------------------------|-------------------------------------------|-------------------------------------------|
| varenicline tartrate                            | Champix    | List with criteria                | QC (full listing); NIHB (with criteria)   | BC; AB; SK; MB; ON; NB; NS; PE; NL        |
| alefacept-Recombinant                           | Amevive    | Do not list                       | None                                      | All provinces and NIHB                    |
| alendronate sodium trihydrate / cholecalciferol | Fosavance  | Do not list                       | ON (full listing)                         | BC; AB; SK; MB; QC; NB; NS; PE; NL; NIHB  |
| aliskiren fumarate                              | Rasilez    | Do not list                       | ON (with criteria); QC (with criteria)    | BC; AB; SK; MB; NB; NS; NS; PE; NL; NIHB  |
| ciclesonide                                     | Omnaris    | Do not list                       | ON (full listing)                         | BC; AB; SK; MB; QC; NB; NS; PE; NL; NIHB  |

| Generic name                  | Brand name | Common Drug Review recommendation | Drug plans with positive listing decision                | Drug plans with negative listing decision |
|-------------------------------|------------|-----------------------------------|----------------------------------------------------------|-------------------------------------------|
| cinacalcet hydrochloride      | Sensipar   | Do not list                       | QC (with criteria); NIHB (with criteria)                 | BC; AB; SK; MB; ON; NB; NS; PE; NL        |
| dabigatran Etexilate Mesilate | Pradax     | Do not list                       | None                                                     | All provinces and NIHB                    |
| daptomycin                    | Cubicin    | Do not list                       | None                                                     | All provinces and NIHB                    |
| eletriptan hydrobromide       | Relpax     | Do not list                       | QC (full listing)                                        | BC; AB; SK; MB; ON; NB; NS; PE; NL; NIHB  |
| insulin aspart                | NovoMix 30 | Do not list                       | BC (full listing); ON (full listing); QC (with criteria) | AB; SK; MB; NB; NS; PE; NL; NIHB          |
| lanthanum carbonate hydrate   | Fosrenol   | Do not list                       | QC (with criteria)                                       | BC; AB; SK; MB; ON; NB; NS; PE; NL; NIHB  |

| Generic name             | Brand name | Common Drug Review recommendation | Drug plans with positive listing decision | Drug plans with negative listing decision |
|--------------------------|------------|-----------------------------------|-------------------------------------------|-------------------------------------------|
| memantine hydrochloride  | Ebixa      | Do not list                       | QC (with criteria)                        | BC; AB; SK; MB; ON; NB; NS; PE; NL; NIHB  |
| methylnaltrexone Bromide | Relistor   | Do not list                       | None                                      | All provinces and NIHB                    |
| omalizumab               | Xolair     | Do not list                       | None                                      | All provinces and NIHB                    |
| paliperidone             | Invega     | Do not list                       | BC (full listing); ON (full listing)      | AB; SK; MB; QC; NB; NS; PE; NL; NIHB      |
| pegaptanib Sodium Salt   | Macugen    | Do not list                       | QC (with criteria)                        | BC; AB; SK; MB; ON; NB; NS; PE; NL; NIHB  |
| pegvisomant              | Somavert   | Do not list                       | None                                      | All provinces and NIHB                    |
| posaconazole             | Posanol    | Do not list                       | ON (with criteria); QC (with criteria)    | BC; AB; SK; MB; NB; NS; PE; NL; NIHB      |

| Generic name                           | Brand name   | Common Drug Review recommendation | Drug plans with positive listing decision | Drug plans with negative listing decision |
|----------------------------------------|--------------|-----------------------------------|-------------------------------------------|-------------------------------------------|
| rasagiline Mesylate                    | Azilect      | Do not list                       | ON (with criteria); QC (with criteria)    | BC; AB; SK; MB; NB; NS; PE; NL; NIHB      |
| rivastigmine                           | Exelon Patch | Do not list                       | BC (with criteria); QC (with criteria)    | AB; SK; MB; ON; NB; NS; PE; NL; NIHB      |
| sodium oxybate                         | Xyrem        | Do not list                       | None                                      | All provinces and NIHB                    |
| telbivudine                            | Sebivo       | Do not list                       | None                                      | All provinces and NIHB                    |
| tetrahydrocannabinol / cannabidiol     | Sativex      | Do not list                       | ON (with criteria)                        | BC; AB; SK; MB; QC; NB; NS; PE; NL; NIHB  |
| tramadol hydrochloride                 | Zytram XL    | Do not list                       | None                                      | All provinces and NIHB                    |
| tramadol hydrochloride / acetaminophen | Tramacet     | Do not list                       | None                                      | All provinces and NIHB                    |
| atomoxetine hydrochloride              | Strattera    | Do not list                       | SK (with criteria); QC (with criteria)    | BC; AB; MB; ON; NB; NS; PE; NL; NIHB      |



| Generic name       | Brand name | Common Drug Review recommendation | Drug plans with positive listing decision | Drug plans with negative listing decision |
|--------------------|------------|-----------------------------------|-------------------------------------------|-------------------------------------------|
| escalopram oxalate | Cipralext  | Do not list                       | BC (full listing); ON (full listing)      | AB; SK; MB; QC; NB; NS; PE; NL; NIHB      |
| idursulfase        | Elaprase   | Do not list                       | ON (with criteria)                        | BC; AB; SK; MB; QC; NB; NS; PE; NL; NIHB  |
| laronidase         | Aldurazyme | Do not list                       | None                                      | All provinces and NIHB                    |
| teriparatide       | Forteo     | Do not list                       | QC (with criteria)                        | BC; AB; SK; MB; ON; NB; NS; PE; NL; NIHB  |

Note: All Common Drug Review Recommendations are based off those made on or prior to May 27, 2009. All drug plan formulary decisions are based off the February 2010 version of IMS Brogan's FAME database.  
Source: IMS Brogan, FAME database
